# Supplementary material for: Evaluation of sample size effect on the identification of haplotype blocks
Source: Springer Nature journal article supplement (doi:10.1186/1471-2105-8-200), 2007-06-14
Supplement: 12859_2006_1572_MOESM1_ESM.pdf [file 12859_2006_1572_MOESM1_ESM.pdf]

## Supplementary Table 1

Mean square error (MSE) in estimating the effect of the mixture of cases with controls

| No. | SNPs interval | (A) 358 controls versus 358 mixed samples |                             |              |                                |                             |              |                                |                             |              | (B) 358 controls versus 725 mixed samples |                             |              |                                |                             |              |                                |                             |              |
|-----|---------------|-------------------------------------------|-----------------------------|--------------|--------------------------------|-----------------------------|--------------|--------------------------------|-----------------------------|--------------|-------------------------------------------|-----------------------------|--------------|--------------------------------|-----------------------------|--------------|--------------------------------|-----------------------------|--------------|
|     |               | Four-gamate                               |                             |              | Gabriel's                      |                             |              | Kamatani's                     |                             |              | Four-gamate                               |                             |              | Gabriel's                      |                             |              | Kamatani's                     |                             |              |
|     |               | $\theta$ value<br>358 controls            | $\theta$ value<br>358 mixed | Square error | $\theta$ value<br>358 controls | $\theta$ value<br>358 mixed | Square error | $\theta$ value<br>358 controls | $\theta$ value<br>358 mixed | Square error | $\theta$ value<br>358 controls            | $\theta$ value<br>725 mixed | Square error | $\theta$ value<br>358 controls | $\theta$ value<br>725 mixed | Square error | $\theta$ value<br>358 controls | $\theta$ value<br>725 mixed | Square error |
| 1   | A001:A002     | 1.0000                                    | 1.0000                      | 0.0000       | 1.0000                         | 1.0000                      | 0.0000       | 1.0000                         | 1.0000                      | 0.0000       | 1.0000                                    | 1.0000                      | 0.0000       | 1.0000                         | 1.0000                      | 0.0000       | 1.0000                         | 1.0000                      | 0.0000       |
| 2   | A002:A003     | 0.0677                                    | 0.0550                      | 0.0002       | 0.0627                         | 0.0543                      | 0.0001       | 0.0580                         | 0.0540                      | 0.0000       | 0.0677                                    | 0.0537                      | 0.0002       | 0.0627                         | 0.0537                      | 0.0001       | 0.0580                         | 0.0533                      | 0.0000       |
| 3   | A003:A004     | 0.0790                                    | 0.0193                      | 0.0036       | 0.0460                         | 0.0163                      | 0.0009       | 0.0093                         | 0.0147                      | 0.0000       | 0.0790                                    | 0.0140                      | 0.0042       | 0.0460                         | 0.0147                      | 0.0010       | 0.0093                         | 0.0137                      | 0.0000       |
| 4   | A004:A005     | 0.0123                                    | 0.0110                      | 0.0000       | 0.0150                         | 0.0103                      | 0.0000       | 0.0050                         | 0.0100                      | 0.0000       | 0.0123                                    | 0.0117                      | 0.0000       | 0.0150                         | 0.0117                      | 0.0000       | 0.0050                         | 0.0113                      | 0.0000       |
| 5   | A005:A006     | 0.0073                                    | 0.0103                      | 0.0000       | 0.0067                         | 0.0100                      | 0.0000       | 0.0047                         | 0.0100                      | 0.0000       | 0.0073                                    | 0.0117                      | 0.0000       | 0.0067                         | 0.0117                      | 0.0000       | 0.0047                         | 0.0113                      | 0.0000       |
| 6   | A006:A007     | 0.0067                                    | 0.0100                      | 0.0000       | 0.0053                         | 0.0097                      | 0.0000       | 0.0043                         | 0.0097                      | 0.0000       | 0.0067                                    | 0.0107                      | 0.0000       | 0.0053                         | 0.0107                      | 0.0000       | 0.0043                         | 0.0103                      | 0.0000       |
| 7   | A007:A008     | 0.0067                                    | 0.0103                      | 0.0000       | 0.0053                         | 0.0097                      | 0.0000       | 0.0043                         | 0.0097                      | 0.0000       | 0.0067                                    | 0.0107                      | 0.0000       | 0.0053                         | 0.0107                      | 0.0000       | 0.0043                         | 0.0103                      | 0.0000       |
| 8   | A008:A009     | 0.0067                                    | 0.0100                      | 0.0000       | 0.0050                         | 0.0093                      | 0.0000       | 0.0043                         | 0.0093                      | 0.0000       | 0.0067                                    | 0.0107                      | 0.0000       | 0.0050                         | 0.0107                      | 0.0000       | 0.0043                         | 0.0103                      | 0.0000       |
| 9   | A009:A010     | 0.0063                                    | 0.0097                      | 0.0000       | 0.0050                         | 0.0090                      | 0.0000       | 0.0043                         | 0.0090                      | 0.0000       | 0.0063                                    | 0.0107                      | 0.0000       | 0.0050                         | 0.0107                      | 0.0000       | 0.0043                         | 0.0103                      | 0.0000       |
| 10  | A010:A011     | 0.0063                                    | 0.0093                      | 0.0000       | 0.0050                         | 0.0087                      | 0.0000       | 0.0043                         | 0.0087                      | 0.0000       | 0.0063                                    | 0.0107                      | 0.0000       | 0.0050                         | 0.0110                      | 0.0000       | 0.0043                         | 0.0103                      | 0.0000       |
| 11  | A011:A012     | 0.0043                                    | 0.0087                      | 0.0000       | 0.0040                         | 0.0080                      | 0.0000       | 0.0037                         | 0.0080                      | 0.0000       | 0.0043                                    | 0.0107                      | 0.0000       | 0.0040                         | 0.0110                      | 0.0000       | 0.0037                         | 0.0103                      | 0.0000       |
| 12  | A012:A013     | 0.0057                                    | 0.0087                      | 0.0000       | 0.0040                         | 0.0080                      | 0.0000       | 0.0037                         | 0.0080                      | 0.0000       | 0.0057                                    | 0.0110                      | 0.0000       | 0.0040                         | 0.0113                      | 0.0001       | 0.0037                         | 0.0107                      | 0.0000       |
| 13  | A013:A014     | 0.0037                                    | 0.0087                      | 0.0000       | 0.0033                         | 0.0080                      | 0.0000       | 0.0033                         | 0.0080                      | 0.0000       | 0.0037                                    | 0.0100                      | 0.0000       | 0.0033                         | 0.0103                      | 0.0000       | 0.0033                         | 0.0097                      | 0.0000       |
| 14  | A014:A015     | 0.0037                                    | 0.0083                      | 0.0000       | 0.0033                         | 0.0077                      | 0.0000       | 0.0033                         | 0.0077                      | 0.0000       | 0.0037                                    | 0.0087                      | 0.0000       | 0.0033                         | 0.0090                      | 0.0000       | 0.0033                         | 0.0083                      | 0.0000       |
| 15  | A015:A016     | 0.0037                                    | 0.0077                      | 0.0000       | 0.0033                         | 0.0073                      | 0.0000       | 0.0033                         | 0.0073                      | 0.0000       | 0.0037                                    | 0.0077                      | 0.0000       | 0.0033                         | 0.0080                      | 0.0000       | 0.0033                         | 0.0073                      | 0.0000       |
| 16  | A016:A017     | 0.0043                                    | 0.0150                      | 0.0001       | 0.0037                         | 0.0073                      | 0.0000       | 0.0033                         | 0.0073                      | 0.0000       | 0.0043                                    | 0.0087                      | 0.0000       | 0.0037                         | 0.0083                      | 0.0000       | 0.0033                         | 0.0073                      | 0.0000       |
| 17  | A017:A018     | 0.0040                                    | 0.0077                      | 0.0000       | 0.0037                         | 0.0073                      | 0.0000       | 0.0033                         | 0.0073                      | 0.0000       | 0.0040                                    | 0.0083                      | 0.0000       | 0.0037                         | 0.0083                      | 0.0000       | 0.0033                         | 0.0073                      | 0.0000       |
| 18  | A018:A019     | 0.0047                                    | 0.0117                      | 0.0000       | 0.0037                         | 0.0073                      | 0.0000       | 0.0033                         | 0.0073                      | 0.0000       | 0.0047                                    | 0.0097                      | 0.0000       | 0.0037                         | 0.0083                      | 0.0000       | 0.0033                         | 0.0073                      | 0.0000       |
| 19  | A019:A020     | 0.0163                                    | 0.0610                      | 0.0020       | 0.0087                         | 0.0090                      | 0.0000       | 0.0117                         | 0.0123                      | 0.0000       | 0.0163                                    | 0.0237                      | 0.0001       | 0.0087                         | 0.0197                      | 0.0001       | 0.0117                         | 0.0120                      | 0.0000       |
| 20  | A020:A021     | 0.3083                                    | 0.3980                      | 0.0080       | 0.0100                         | 0.0177                      | 0.0001       | 0.1097                         | 0.2500                      | 0.0197       | 0.3083                                    | 0.3237                      | 0.0002       | 0.0100                         | 0.0577                      | 0.0023       | 0.1097                         | 0.2017                      | 0.0085       |
| 21  | A021:A022     | 0.1467                                    | 0.1287                      | 0.0003       | 0.0090                         | 0.0133                      | 0.0000       | 0.1313                         | 0.0623                      | 0.0048       | 0.1467                                    | 0.1210                      | 0.0007       | 0.0090                         | 0.0393                      | 0.0009       | 0.1313                         | 0.0573                      | 0.0055       |
| 22  | A022:A023     | 0.0083                                    | 0.0073                      | 0.0000       | 0.0067                         | 0.0103                      | 0.0000       | 0.0063                         | 0.0070                      | 0.0000       | 0.0083                                    | 0.0077                      | 0.0000       | 0.0067                         | 0.0453                      | 0.0015       | 0.0063                         | 0.0050                      | 0.0000       |
| 23  | A023:A024     | 0.0183                                    | 0.0243                      | 0.0000       | 0.0050                         | 0.0057                      | 0.0000       | 0.0063                         | 0.0067                      | 0.0000       | 0.0183                                    | 0.0093                      | 0.0001       | 0.0050                         | 0.0140                      | 0.0001       | 0.0063                         | 0.0040                      | 0.0000       |
| 24  | A024:A025     | 0.0050                                    | 0.0017                      | 0.0000       | 0.0023                         | 0.0023                      | 0.0000       | 0.0020                         | 0.0010                      | 0.0000       | 0.0050                                    | 0.0023                      | 0.0000       | 0.0023                         | 0.0053                      | 0.0000       | 0.0020                         | 0.0013                      | 0.0000       |
| 25  | A025:A026     | 0.0070                                    | 0.0127                      | 0.0000       | 0.0047                         | 0.0023                      | 0.0000       | 0.0033                         | 0.0017                      | 0.0000       | 0.0070                                    | 0.0103                      | 0.0000       | 0.0047                         | 0.0157                      | 0.0001       | 0.0033                         | 0.0013                      | 0.0000       |
| 26  | A026:A027     | 0.0087                                    | 0.0023                      | 0.0000       | 0.0033                         | 0.0007                      | 0.0000       | 0.0030                         | 0.0007                      | 0.0000       | 0.0087                                    | 0.0040                      | 0.0000       | 0.0033                         | 0.0070                      | 0.0000       | 0.0030                         | 0.0013                      | 0.0000       |
| 27  | A027:A028     | 0.0427                                    | 0.0493                      | 0.0000       | 0.0190                         | 0.0180                      | 0.0000       | 0.0163                         | 0.0087                      | 0.0001       | 0.0427                                    | 0.0700                      | 0.0007       | 0.0190                         | 0.0630                      | 0.0019       | 0.0163                         | 0.0087                      | 0.0001       |
| 28  | A028:A029     | 0.2800                                    | 0.1803                      | 0.0099       | 0.1503                         | 0.0640                      | 0.0075       | 0.1857                         | 0.0550                      | 0.0171       | 0.2800                                    | 0.2070                      | 0.0053       | 0.1503                         | 0.1367                      | 0.0002       | 0.1857                         | 0.0357                      | 0.0225       |
| 29  | A029:A030     | 0.1377                                    | 0.0510                      | 0.0075       | 0.1297                         | 0.0567                      | 0.0053       | 0.1143                         | 0.0340                      | 0.0065       | 0.1377                                    | 0.0500                      | 0.0077       | 0.1297                         | 0.0583                      | 0.0051       | 0.1143                         | 0.0340                      | 0.0065       |
| 30  | A030:A031     | 0.1307                                    | 0.0467                      | 0.0071       | 0.1223                         | 0.0390                      | 0.0069       | 0.1120                         | 0.0340                      | 0.0061       | 0.1307                                    | 0.0550                      | 0.0057       | 0.1223                         | 0.0610                      | 0.0038       | 0.1120                         | 0.0340                      | 0.0061       |
| 31  | A031:A032     | 0.1393                                    | 0.0480                      | 0.0083       | 0.1263                         | 0.0380                      | 0.0078       | 0.1120                         | 0.0343                      | 0.0060       | 0.1393                                    | 0.0543                      | 0.0072       | 0.1263                         | 0.0567                      | 0.0049       | 0.1120                         | 0.0347                      | 0.0060       |
| 32  | A032:A033     | 0.1990                                    | 0.0660                      | 0.0177       | 0.1567                         | 0.0590                      | 0.0095       | 0.1177                         | 0.0373                      | 0.0065       | 0.1990                                    | 0.0870                      | 0.0125       | 0.1567                         | 0.1153                      | 0.0017       | 0.1177                         | 0.0360                      | 0.0067       |
| 33  | A033:A034     | 0.1260                                    | 0.0440                      | 0.0067       | 0.1577                         | 0.0583                      | 0.0099       | 0.1143                         | 0.0377                      | 0.0059       | 0.1260                                    | 0.0463                      | 0.0063       | 0.1577                         | 0.0597                      | 0.0096       | 0.1143                         | 0.0370                      | 0.0060       |
| 34  | A034:A035     | 0.2500                                    | 0.1193                      | 0.0171       | 0.1800                         | 0.0633                      | 0.0136       | 0.1410                         | 0.0493                      | 0.0084       | 0.2500                                    | 0.1563                      | 0.0088       | 0.1800                         | 0.1320                      | 0.0023       | 0.1410                         | 0.0423                      | 0.0097       |
| 35  | A035:A036     | 0.3080                                    | 0.1040                      | 0.0416       | 0.3170                         | 0.1153                      | 0.0407       | 0.2427                         | 0.0780                      | 0.0271       | 0.3080                                    | 0.1313                      | 0.0312       | 0.3170                         | 0.1687                      | 0.0220       | 0.2427                         | 0.0927                      | 0.0225       |
| 36  | A036:A037     | 0.6677                                    | 0.7563                      | 0.0079       | 0.6693                         | 0.5843                      | 0.0072       | 0.7240                         | 0.8857                      | 0.0261       | 0.6677                                    | 0.6523                      | 0.0002       | 0.6693                         | 0.7430                      | 0.0054       | 0.7240                         | 0.9620                      | 0.0566       |
| MSE |               |                                           |                             | 0.00384      |                                |                             | 0.00305      |                                |                             | 0.00374      |                                           |                             | 0.00255      |                                |                             | 0.00176      |                                |                             | 0.00436      |

(A)  $\theta$  profiles were calculated with 358 controls ( $N = 3,000$ ) and compared with 358 mixed data of controls and cases ( $N = 3,000$ ).

(B)  $\theta$  profiles were calculated with 358 controls ( $N = 3,000$ ) and compared with 752 mixed data of controls and cases ( $N = 3,000$ ).
