# Supplementary material for: Evaluation of sample size effect on the identification of haplotype blocks
Source: Springer Nature journal article supplement (doi:10.1186/1471-2105-8-200), 2007-06-14
Supplement: 12859_2006_1572_MOESM2_ESM.pdf [file 12859_2006_1572_MOESM2_ESM.pdf]

## Supplementary Table 2

Summary of 725 Japanese samples

| Phenotype                | Normal controls | Type 2 diabetic patients |
|--------------------------|-----------------|--------------------------|
| Number of samples        | 358             | 367                      |
| Male / Female            | 145 / 213       | 191 / 176                |
| Age (years)              | 38.1 ± 14.2     | 64.1 ± 10.1              |
| BMI (kg/m <sup>2</sup> ) | 21.9 ± 2.9      | 23.6 ± 3.4               |
| HbA1c (%)                | 4.7 ± 0.3       | 7.4 ± 1.4                |

Age, BMI, and HbA1c are represented as the means ± SD. BMI denotes body mass index.
