# Supplementary material for: Evaluation of sample size effect on the identification of haplotype blocks
Source: Springer Nature journal article supplement (doi:10.1186/1471-2105-8-200), 2007-06-14

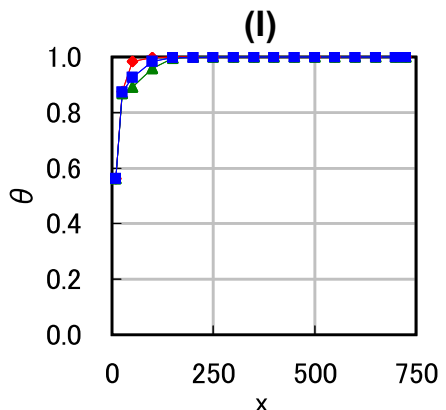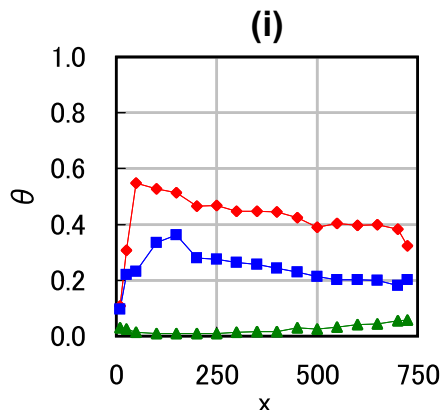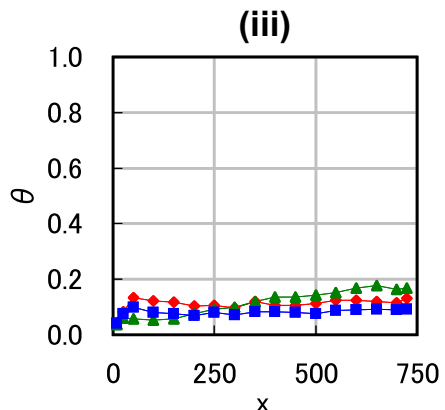

- Kamatani's method
- ▲ Gabriel's method
- ◆ Four-gamete test

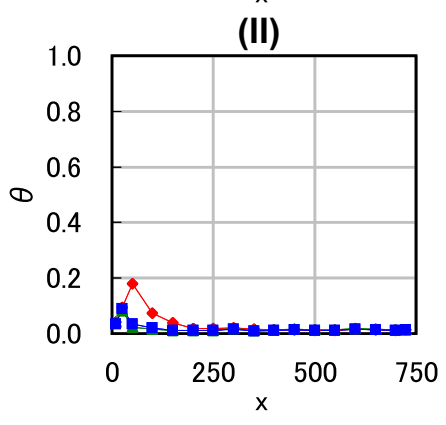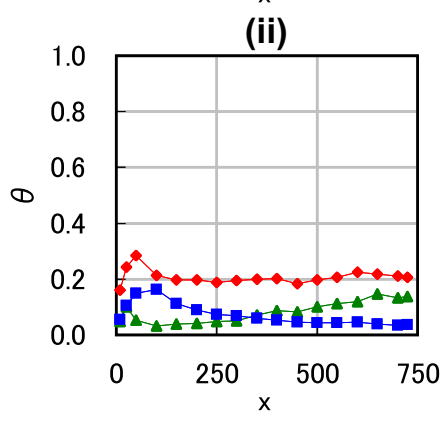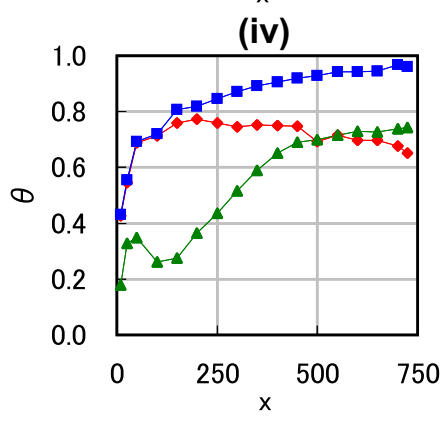

Supplement: 12859_2006_1572_MOESM6_ESM.pdf [file 12859_2006_1572_MOESM6_ESM.pdf]
